# Supplementary material
Source: Springer Nature journal article supplement (https://www.springermedizin.de/resource/supplementary/12943_2010_757_MOESM4_ESM.pdf/9554750)

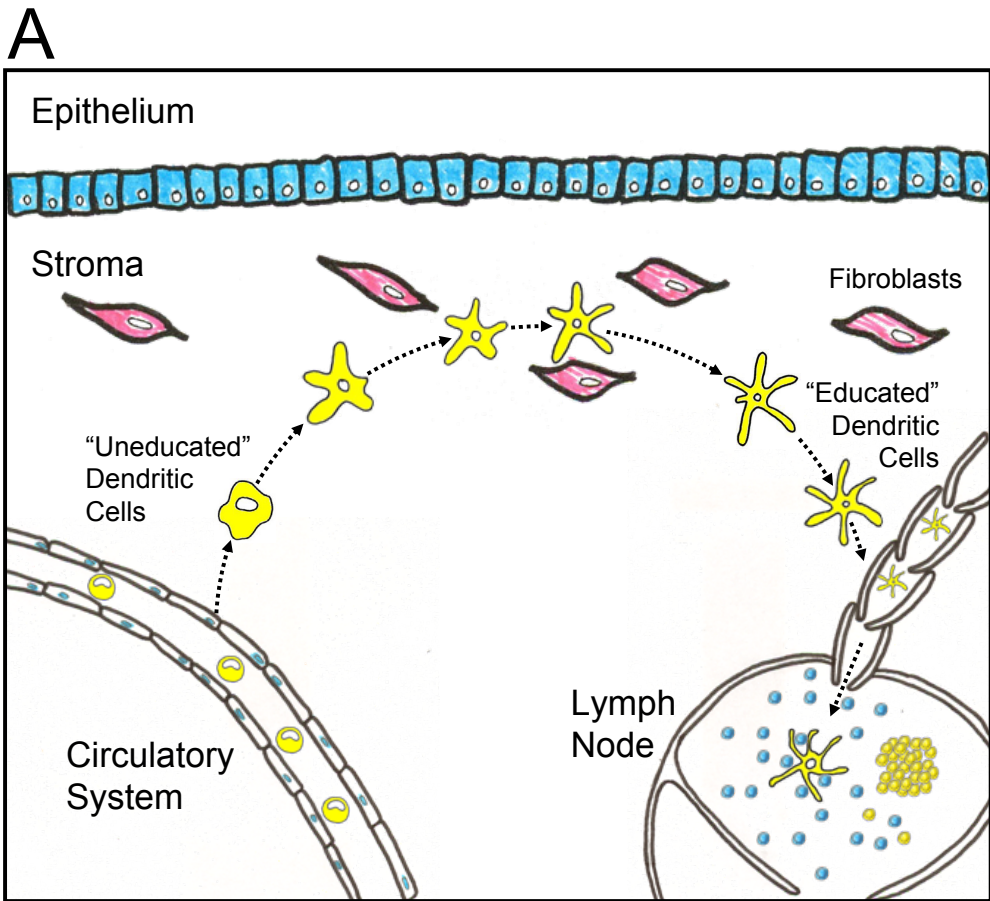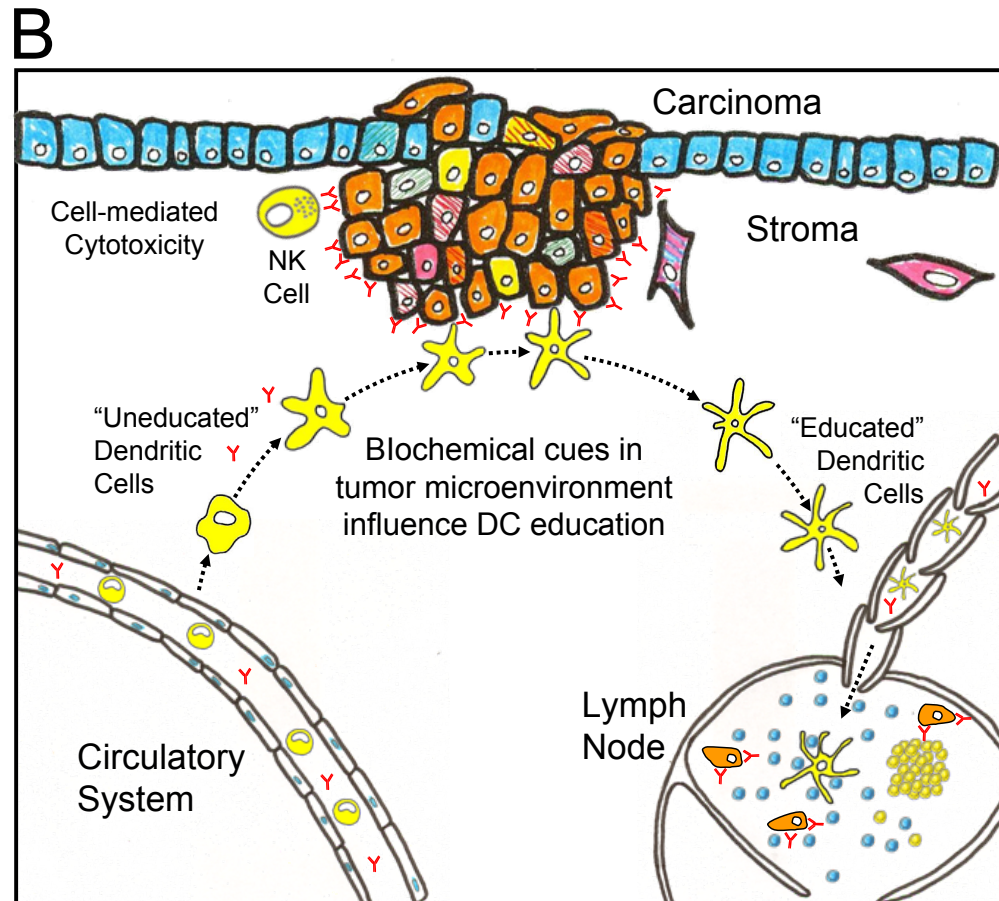

Supplement: MOESM4 [file 9554750]
